# Supplementary material for: Synergy of Peptide and Sugar in O-GlcNAcase Substrate Recognition
Source: PubMed Central journal article supplement (PMC3476531; doi:10.1016/j.chembiol.2012.01.011), 2012-02-24
Supplement: mmc1.pdf [file mmc1.pdf]

## Supplemental Information

### Synergy of Peptide and Sugar in O-GlcNAcase Substrate Recognition

Marianne Schimpl, Vladimir S. Borodkin, Lindsey J. Gray, and Daan M.F. van Aalten

#### Inventory of Supplemental Information

**Fig. S1 Human and bacterial OGA show similar  $K_m$  trends for a range of glycopeptide substrates.**

**Related to Fig. 1B, depicting the correlation between  $K_m$  values for different substrate peptides for the human enzyme and the bacterial homologue.**

**Fig. S2 Accessibility of the active site in the new crystal form of CpOGA.**

**Related to Fig. 1C-D, demonstrating the advantages of the crystal form reported here, and its applicability for soaking experiments.**

**Table S1. Data collection and refinement statistics for CpOGA D298N in complex with GlcNAc-modified peptides.**

**Related to and referenced in the Experimental Procedures section.**

**Figure S1. Human and bacterial OGA show similar  $K_m$  trends for a range of glycopeptide substrates.**

(Related to Figure 1B). Correlation plot of the  $K_m$  values of glycopeptide substrates for hOGA and

CpOGA. Numeric values of the data plotted in here as well as in Fig. 1B are given below.

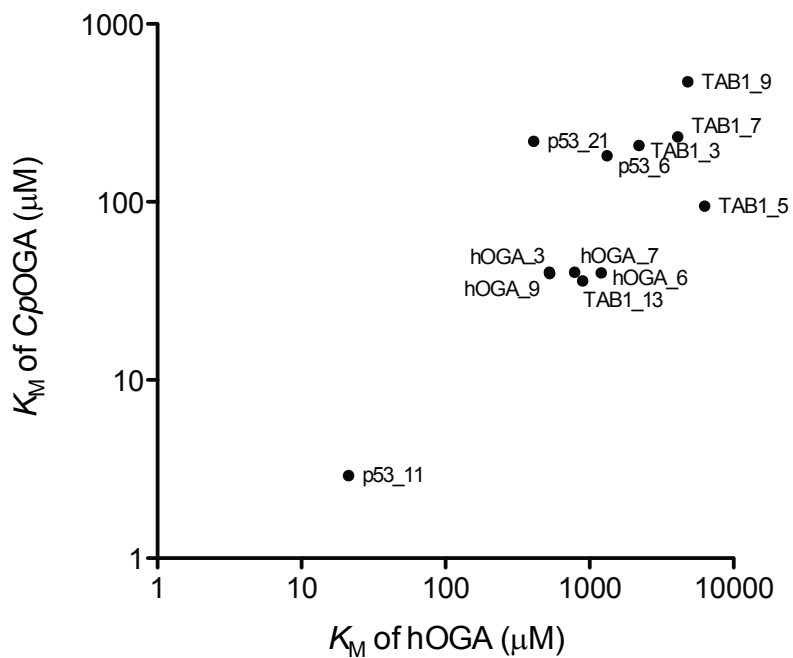

| $K_m$ ( $\mu\text{M}$ ) | hOGA           | CpOGA         |
|-------------------------|----------------|---------------|
| Peptide length (a.a.)   |                |               |
| TAB1 (Ser395)           |                |               |
| 3                       | 2200 $\pm$ 100 | 210 $\pm$ 30  |
| 5                       | 6300 $\pm$ 500 | 100 $\pm$ 20  |
| 7                       | 4100 $\pm$ 300 | 230 $\pm$ 20  |
| 9                       | 4800 $\pm$ 300 | 470 $\pm$ 70  |
| 13                      | 900 $\pm$ 30   | 36 $\pm$ 1    |
| hOGA (Ser405)           |                |               |
| 3                       | 520 $\pm$ 10   | 40 $\pm$ 5    |
| 6                       | 1200 $\pm$ 40  | 40 $\pm$ 10   |
| 7                       | 790 $\pm$ 40   | 40 $\pm$ 10   |
| 9                       | 530 $\pm$ 20   | 40 $\pm$ 6    |
| p53 (Ser149)            |                |               |
| 5                       | 1300 $\pm$ 200 | 48 $\pm$ 8    |
| 11                      | 21 $\pm$ 2     | 2.9 $\pm$ 0.4 |
| 21                      | 410 $\pm$ 20   | 220 $\pm$ 10  |

**Figure S2. Accessibility of the active site in the new crystal form of *CpOGA*.** (Related to Fig. 1C-D)

In the previously published  $I2_12_12_1$  crystal form (PDB ID 2J62) of *CpOGA*, crystal contacts limit the accessibility of the enzyme's active site. The new  $P6_1$  crystal form reported here possesses a similar protein conformation (RMSD of 0.50 Å over 578  $C_{\alpha}$ s) but fully accessible active site. In the figure below, one molecule of *CpOGA* is depicted with  $\alpha$ -helices shown in cyan and  $\beta$ -sheets shown in blue, with a semi-transparent surface. Neighboring symmetry-related protein molecules are shown in shades of grey. The 11-amino acid glycopeptide (pink sticks) is bound in the active site, which is facing a solvent channel, making this crystal form well suited for soaking experiments. The shortest distance between the glycopeptide and any atom on a symmetry-related protein molecule is 9 Å.

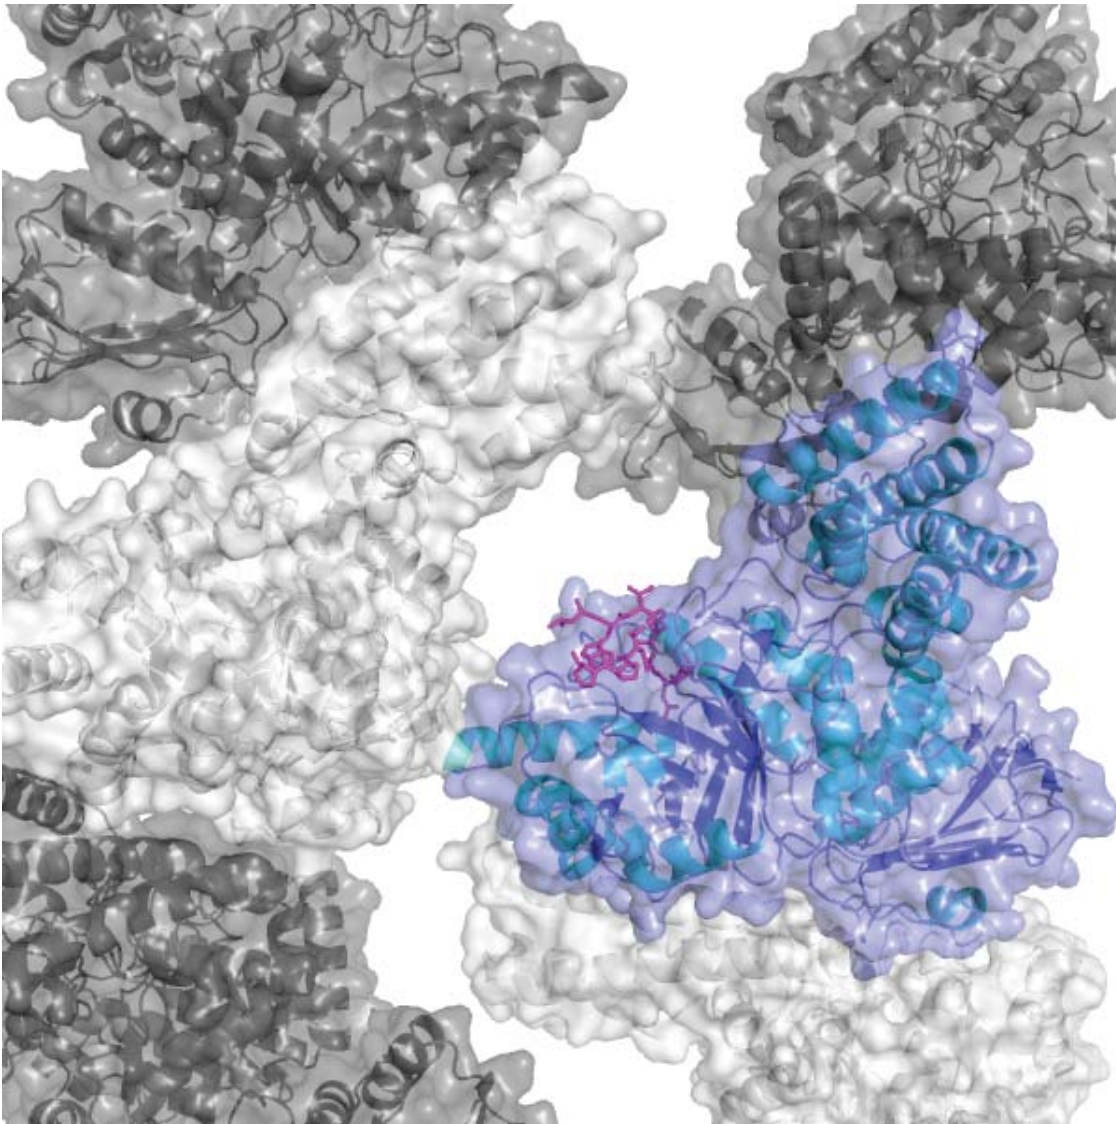

**Table S1. Data collection and refinement statistics for CpOGA D298N in complex with GlcNAc-modified peptides.** Values for the highest resolution shell are given in parentheses.

|                                                     | CpOGA D298N :<br>hOGA O-GlcNAc peptide<br>Ac-VAHS(O-GlcNAc)GA-<br>NH <sub>2</sub> | CpOGA D298N :<br>TAB1 O-GlcNAc<br>peptide<br>Ac-VPYS(O-<br>GlcNAc)SAQ-NH <sub>2</sub> | CpOGA D298N :<br>p53 O-GlcNAc peptide<br>Ac-QLWVDS(O-<br>GlcNAc)TPPPG-NH <sub>2</sub> |
|-----------------------------------------------------|-----------------------------------------------------------------------------------|---------------------------------------------------------------------------------------|---------------------------------------------------------------------------------------|
| <b>Data collection</b>                              |                                                                                   |                                                                                       |                                                                                       |
| Beamline, wavelength                                | ID14-1, 0.934 Å                                                                   | I03, 0.976 Å                                                                          | I03, 0.976 Å                                                                          |
| Space group                                         | P6 <sub>1</sub>                                                                   | P6 <sub>1</sub>                                                                       | P6 <sub>1</sub>                                                                       |
| Cell dimensions (Å )                                | <i>a</i> = <i>b</i> =118.1, <i>c</i> =148.2                                       | <i>a</i> = <i>b</i> =118.1, <i>c</i> =148.3                                           | <i>a</i> = <i>b</i> =118.1, <i>c</i> =148.3                                           |
| Resolution (Å )                                     | 25-2.6 (2.69-2.60)                                                                | 24.6-2.55 (2.69-2.55)                                                                 | 25-2.75 (2.90-2.75)                                                                   |
| <i>R</i> <sub>merge</sub>                           | 0.155 (0.679)                                                                     | 0.122 (0.667)                                                                         | 0.154 (0.575)                                                                         |
| <i>I</i> / $\sigma$                                 | 6.9 (2.5)                                                                         | 7.1 (2.0)                                                                             | 7.5 (2.7)                                                                             |
| Completeness (%)                                    | 100.0 (100.0)                                                                     | 98.7 (99.4)                                                                           | 92.5 (94.3)                                                                           |
| Redundancy                                          | 7.7 (6.8)                                                                         | 3.1 (3.1)                                                                             | 4.4 (4.3)                                                                             |
| <b>Refinement</b>                                   |                                                                                   |                                                                                       |                                                                                       |
| Unique reflections                                  | 36085                                                                             | 37698                                                                                 | 28111                                                                                 |
| <i>R</i> <sub>work</sub> , <i>R</i> <sub>free</sub> | 0.197 / 0.235                                                                     | 0.190 / 0.226                                                                         | 0.185 / 0.219                                                                         |
| No. atoms                                           |                                                                                   |                                                                                       |                                                                                       |
| Protein                                             | 4578                                                                              | 4580                                                                                  | 4578                                                                                  |
| Cadmium                                             | 19                                                                                | 19                                                                                    | 19                                                                                    |
| Glycopeptide                                        | 55                                                                                | 57                                                                                    | 77                                                                                    |
| Water                                               | 77                                                                                | 122                                                                                   | 102                                                                                   |
| <i>B</i> -factors                                   |                                                                                   |                                                                                       |                                                                                       |
| Protein                                             | 27                                                                                | 36                                                                                    | 28                                                                                    |
| Glycopeptide                                        | 40                                                                                | 59                                                                                    | 48                                                                                    |
| R.m.s. deviations                                   |                                                                                   |                                                                                       |                                                                                       |
| Bond lengths (Å)                                    | 0.013                                                                             | 0.013                                                                                 | 0.014                                                                                 |
| Bond angles (°)                                     | 1.45                                                                              | 1.44                                                                                  | 1.46                                                                                  |
| Ramachandran plot                                   |                                                                                   |                                                                                       |                                                                                       |
| most favoured (%)                                   | 90.2                                                                              | 90.3                                                                                  | 90.0                                                                                  |
| generously allowed (%)                              | 9.1                                                                               | 9.3                                                                                   | 9.2                                                                                   |
| additionally allowed (%)                            | 0.8                                                                               | 0.4                                                                                   | 1.0                                                                                   |
| disallowed (%)                                      | 0.0                                                                               | 0.0                                                                                   | 0.0                                                                                   |
| <b>Pdb ID</b>                                       | <b>2ydq</b>                                                                       | <b>2yds</b>                                                                           | <b>2ydr</b>                                                                           |
